# Supplementary material for: Structural and Energetic Affinity of Annocatacin B with ND1 Subunit of the Human Mitochondrial Respiratory Complex I as a Potential Inhibitor: An In Silico Comparison Study with the Known Inhibitor Rotenone
Source: MDPI journal article supplement (doi:10.3390/polym13111840), 2021-06-02
Supplement: s1 [file s1]

# **Structural and Energetic Affinity of Annocatacin B with ND1 Subunit of the Human Mitochondrial Respiratory Complex I as a Potential Inhibitor: An in silico Comparison Study with the Known Inhibitor Rotenone**

May 27, 2021

Camilo Febres-Molina<sup>1</sup>; Jorge Alberto Aguilar-Pineda<sup>2</sup>; Pamela Gamero-Begazo<sup>1</sup>; Haruna L. Barazorda-Ccahuana<sup>1</sup>; Diego E. Valencia<sup>1</sup>; Karin J. Vera-López<sup>2</sup>; Gonzalo Davila-Del Carpio<sup>3</sup>, Gómez Valdez, Badhin<sup>1,4\*</sup>

<sup>1</sup>Centro de Investigación en Ingeniería Molecular, CIIM, Universidad Católica de Santa María, Urb. San José s/n - Umacollo, Arequipa Perú.

<sup>2</sup>Laboratory of Genomics and Neurovascular Diseases, Vicerrectorado de Investigación, Universidad Católica de Santa María, Arequipa, Peru.

<sup>3</sup>Vicerrectorado de Investigación, Universidad Católica de Santa María, Arequipa Perú.

<sup>4</sup>Facultad de Ciencias Farmacéuticas, Bioquímicas y Biotecnológicas, Universidad Católica de Santa María, Urb. San José s/n - Umacollo, Arequipa, Perú

*Keywords:* Annocatacin B, ND1 subunit, mitochondrial respiratory complex I, MRC-I, molecular dynamics simulations, MD, Hirshfeld charges, MM/PBSA

\* Author to whom correspondence should be addressed.  
Electronic mail: bgomez@ucsm.edu.pe; Tel.: +51-982895067

## Supplementary Figures

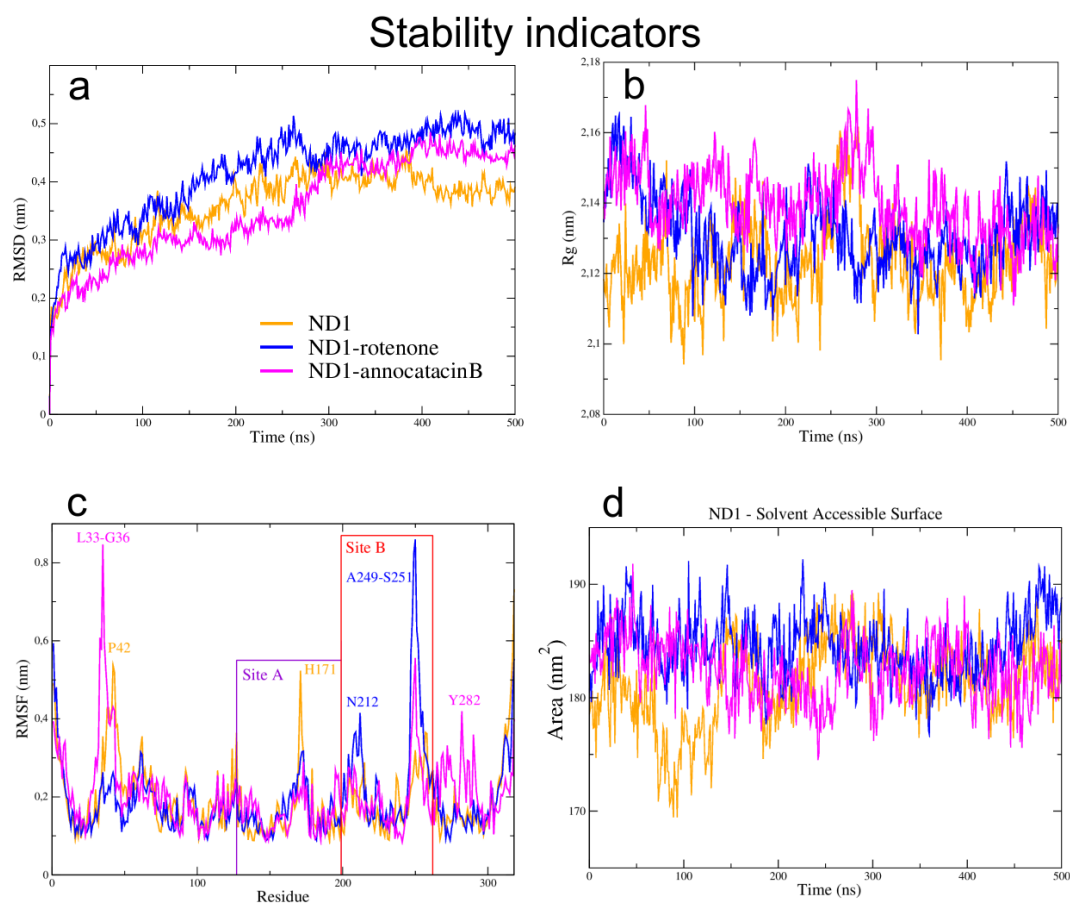

**Figure S1.** Stability indicators used in this work. Plots were obtained in full MD simulations. (a) Root mean square deviation (RMSD). (b) The total radius of gyration (RG). (c) Root mean square fluctuation of C $\alpha$  atoms. The A and B sites comprise the active site of the ND1 subunit. (d) Solvent accessible area (SAS) of the ND1 protein in the molecular complexes.

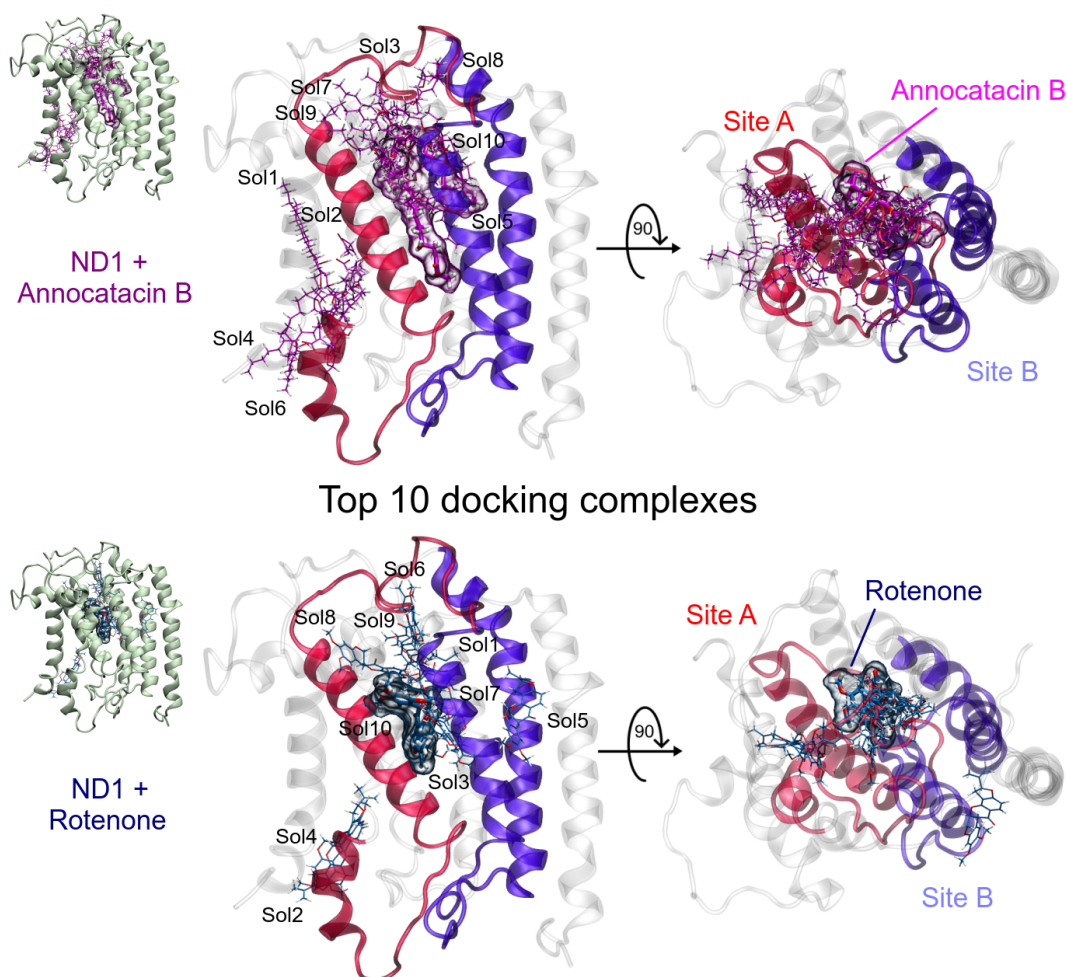

**Figure S2.** Top 10 structure complexes of the PatchDock docking results. Above figures correspond to the ND1-Annocatacin B complexes. Below figures correspond to the ND1-Rotenone complexes.

**Table S1.** System details in the MD simulations.

| System details      |            |                |         |                   |        |             |                       |                        |
|---------------------|------------|----------------|---------|-------------------|--------|-------------|-----------------------|------------------------|
| Protein             | Aminoacids | DPPC molecules | Ligand  | Solvent molecules | Na ion | Total atoms | box size [nm]         | Run time [h] (Approx.) |
| ND1                 | 318 (5127) | 507 (25350)    | -       | 37861 (113583)    | 1      | 144061      | 11.70 x 11.74 x 12.98 | 2496                   |
| ND1 + Rotenone      | 318 (5127) | 507 (25350)    | 1 (51)  | 43345 (130035)    | 1      | 160563      | 11.64 x 11.68 x 14.34 | 2976                   |
| ND1 + Annocatacin B | 318 (5127) | 507 (25350)    | 1 (103) | 37817 (113451)    | 1      | 143982      | 11.62 x 11.66 x 13.13 | 2351                   |
